# Supplementary material
Source: PubMed Central journal article supplement (PMC5972015)
Supplement: NIHMS968892-supplement-SI.pdf [file NIHMS968892-supplement-SI.pdf]

## Supporting Information:

### Near-infrared Fluorescent Nanocapsules with Reversible Response to Thermo/pH Modulation for Optical Imaging

*Yongping Chen and Xingde Li*

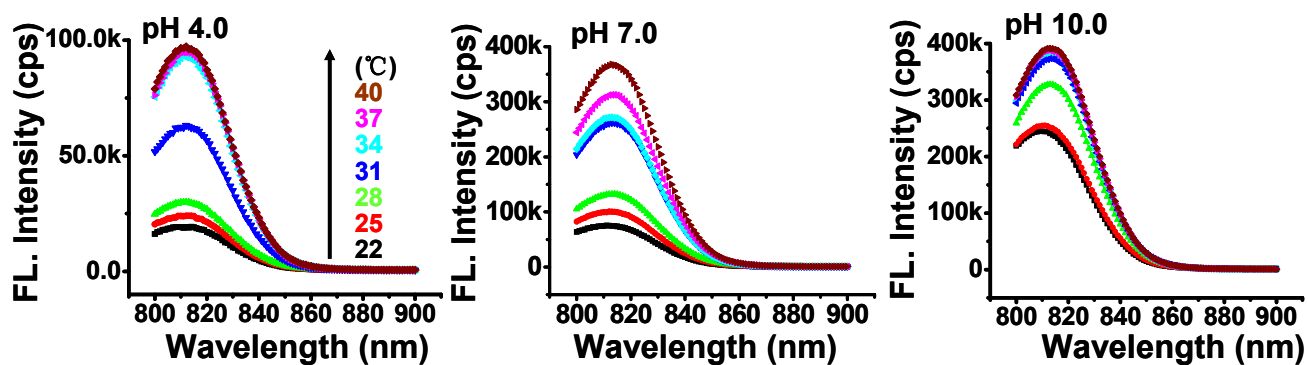

**Figure S-1.** Fluorescence spectra of the PEI crosslinked ICG nanocapsules for temperature ranging from 22 to 40 °C at pH 4.0, 7.0 and 10.0, respectively. It was noted that the spectra (e.g. both shape and peak wavelength) did not experience much change yet the fluorescence intensity increased as temperature increased.

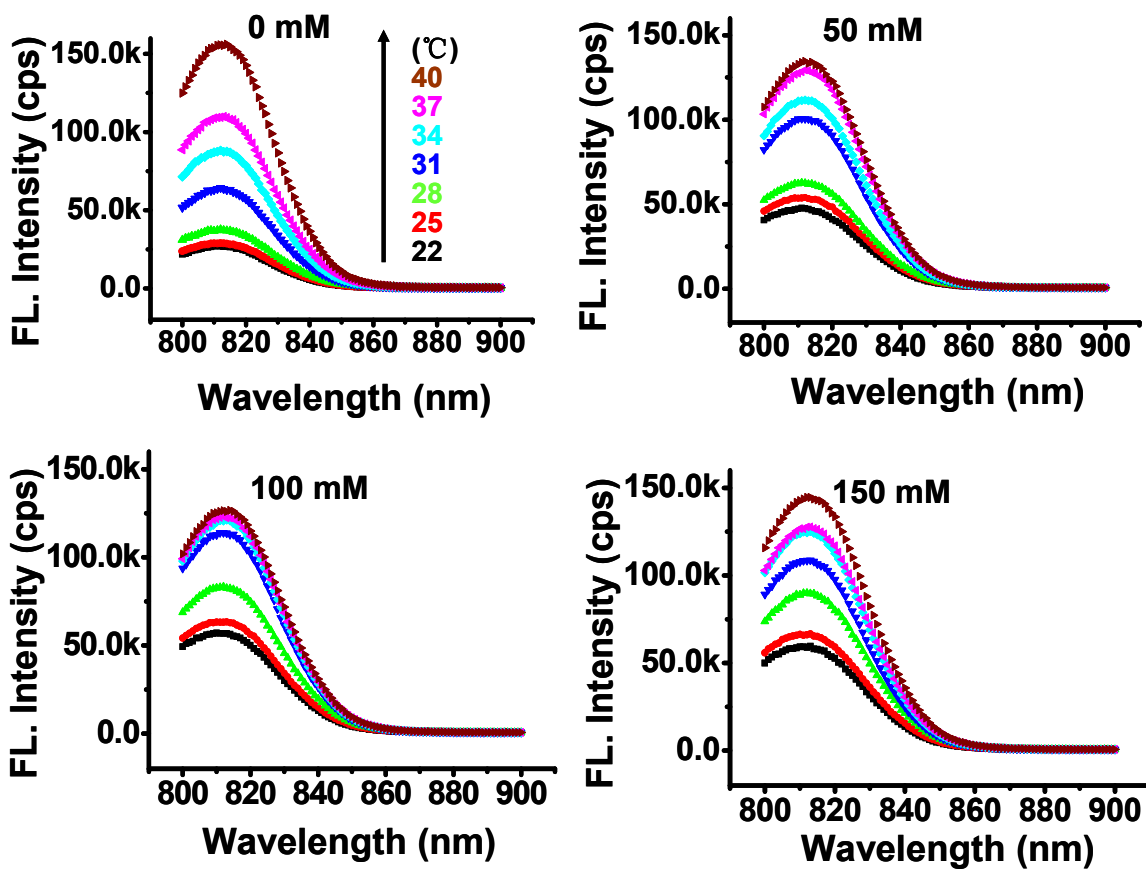

**Figure S-2.** The fluorescence spectra of the nanocapsules versus temperature (from 22 to 40 °C) at different concentrations of sodium chloride. It was noted that the spectra shape did not experience much change but the fluorescence intensity increased as the temperature increased.

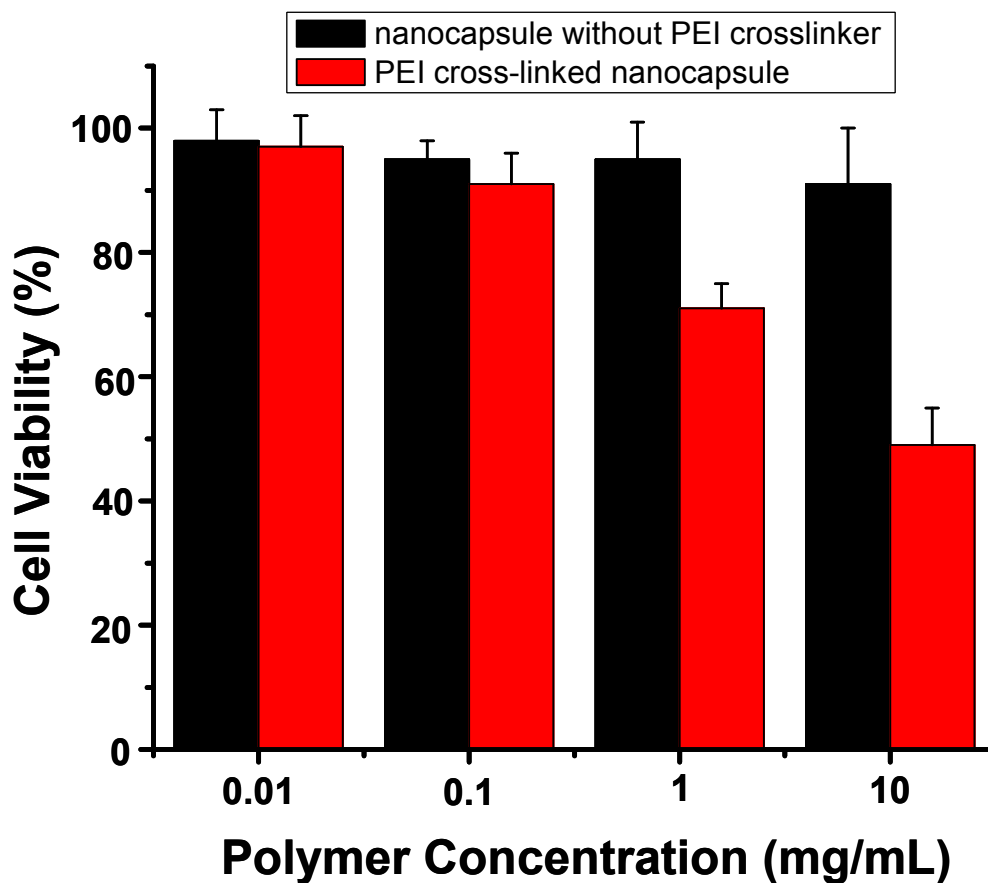

**Figure S-3.** Cell viability study results after incubation of A431 cancer cells with various amounts of ICG nanocapsules with and without the PEI cross-linkers. The percentage cell viability was calculated as the ratio of the MTT cytotoxicity readout from the samples that were incubated with the ICG nanocapsules (with and without the PEI cross-linkers) to the readout from the control cells that were incubated with standard culture medium.
